# Supplementary material for: Paleoenvironmental changes related to the variations of the sea-ice cover during the Late Holocene in an Antarctic fjord (Edisto Inlet, Ross Sea) inferred by foraminiferal association
Source: Copernicus journal article supplement (doi:10.5194/jm-42-95-2023), 2023-09-13
Supplement: Supplementary file 1 [file jm-42-95-2023-supplement.zip]

Archive with 2 entries (2 files):
- jm-42-95-2023-supplement-title-page.pdf
- SupplementaryMaterial1.xlsx
