# Supplementary material for: Paleoenvironmental changes related to the variations of the sea-ice cover during the Late Holocene in an Antarctic fjord (Edisto Inlet, Ross Sea) inferred by foraminiferal association
Source: Copernicus journal article supplement (doi:10.5194/jm-42-95-2023), 2023-09-13
Supplement: Supplementary file 1 [file jm-42-95-2023-supplement.zip › jm-42-95-2023-supplement-title-page.pdf]

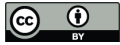

*Supplement of*

**Paleoenvironmental changes related to the variations of the sea-ice cover during the Late Holocene in an Antarctic fjord (Edisto Inlet, Ross Sea) inferred by foraminiferal association**

**Giacomo Galli et al.**

*Correspondence to:* Giacomo Galli ([giacomo.galli@unive.it](mailto:giacomo.galli@unive.it))

- [jm-42-95-2023-supplement-title-page.pdf](#)
- [SupplementaryMaterial1.xlsx](#)

The copyright of individual parts of the supplement might differ from the article licence.
