# Supplementary material for: Paleoenvironmental changes related to the variations of the sea-ice cover during the Late Holocene in an Antarctic fjord (Edisto Inlet, Ross Sea) inferred by foraminiferal association
Source: Copernicus journal article supplement (doi:10.5194/jm-42-95-2023), 2023-09-13
Supplement: Supplementary file 1 [file SupplementaryMaterial1.xlsx]

## Sheet: SamplesAge_core
Depth (cm)	Age (yrs BP)	Sed. Rate (cm/yrs)	Error (2𝜎)	DryWeight (g)	Density (g/cm3)
1.5	-66	0.0709	38.5	0.5829	0.322927
10.5	-26	0.0755	112.5	0.3298	0.202223
15.5	50	0.0711	170	3.35	0.344
20.5	145	0.076	214.5	0.87	0.389242
25.5	258	0.0736	242.5	0.0842	0.174
30.5	372	0.0777	263.5	0.305	0.180369
35.5	478	0.0701	282.5	1.2343	0.322
40.5	580	0.0719	295.5	1.0046	0.32082
50.5	679	0.0717	307.5	0.4277	0.268123
60.5	691	0.393	314.5	0.6437	0.305764
65.5	696	0.492	372	0.68	0.380386
74.5	708	0.504	376	0.2998	0.211441
84.5	727	0.481	377.5	0.1269	0.151925
94.5	748	0.487	379	0.49	0.261857
104.5	770	0.488	379.5	0.1215	0.141051
114.5	793	0.499	379.5	0.3556	0.204605
124.5	816	0.496	380	0.391	0.235588
134.5	838	0.494	380	0.2068	0.165724
144.5	861	0.47	380	0.4271	0.302337
153.5	881	0.484	380.5	0.696	0.262643
157.5	890	0.495	381	0.2682	0.227856
166.5	910	0.486	381	0.51	0.28321
176.5	931	0.496	381.5	0.6769	0.284216
186.5	953	0.489	381.5	0.2214	0.169106
196.5	974	0.479	382	0.0636	0.136153
206.5	995	0.491	382	0.4754	0.303118
216.5	1016	0.482	383	0.9699	0.369059
226.5	1037	0.496	383.5	0.4017	0.217012
236.5	1057	0.527	383.5	0.2165	0.225181
246.5	1076	0.511	384	1.4043	0.425896
254.5	1091	0.53	383.5	0.6575	0.330929
264.5	1109	0.527	384	0.4795	0.275854
274.5	1129	0.52	384	0.731	0.276736
284.5	1148	0.532	384.5	0.818	0.316728
294.5	1167	0.519	384.5	0.6937	0.321056
304.5	1186	0.513	384.5	0.4613	0.266691
314.5	1205	0.516	384.5	0.4013	0.224254
324.5	1225	0.515	385	0.7452	0.349137
334.5	1245	0.538	385	0.3522	0.2293
344.5	1264	0.534	384.5	0.2717	0.278182
352.5	1279	0.533	385	0.9674	0.332392
361.5	1297	0.512	385.5	0.7381	0.275685
371.5	1317	0.512	385	0.4481	0.212487
381.5	1336	0.519	384.5	0.2903	0.195091
391.5	1356	0.523	385	0.1533	0.173268
401.5	1375	0.542	355	0.3283	0.218573
411.5	1394	0.518	315.5	0.6115	0.329673
421.5	1414	0.528	302	0.3272	0.194012
431.5	1432	0.532	294	0.2866	0.237811
441.5	1452	0.539	273.5	1.005	0.409151
451.5	1470	0.536	249.5	0.8837	0.321564
460.5	1486	0.543	225	0.8812	0.342266
470.5	1507	0.388	189	0.2469	0.223859
480.5	1533	0.389	137	0.2014	0.194713
490.5	1559	0.401	66	0.4567	0.28767
500.5	1585	0.387	16	0.5986	0.254742
510.5	1610	0.385	23.5	0.2463	0.218935
520.5	1663	0.242	35.5	0.1226	0.167286
530.5	1697	0.411	44	0.4471	0.271568
540.5	1721	0.384	50.5	0.2422	0.216462
552.5	1749	0.376	55.5	0.9044	0.289819
561.5	1772	0.385	61	0.3221	0.254502
571.5	1797	0.393	65	0.9203	0.356494
581.5	1824	0.391	67.5	0.1957	0.236291
591.5	1851	0.38	72	0.869	0.354537
601.5	1878	0.398	75.5	1.2804	0.350984
611.5	1905	0.393	78.5	1.184	0.413306
621.5	1932	0.388	81	0.6823	0.436817
631.5	1960	0.376	83	1.0894	0.31472
641.5	1987	0.396	85.5	1.3317	0.320765
650.5	2012	0.381	88	0.6825	0.294405

## Sheet: Counting
section	interval (cm)	Cumulative depth(cm)	Age (yrs BP)	Astrononion echolsi	Astrononion antarticum	Cassidulinoides porrectus	Cibicides lobatulus	Cibicides refulgens	Epistominella exigua	Fissurina semimarginata	Fissurina sp.	Globocassidulina biora	Globocassidulina crassa	Globocassidulina sp.	Globocassidulina subglobosa	Heronallenia Kempii	Hyalinonetrion sahulense	Melonis barleanum	Nonionella bradii	Nonionella iridea	Nonionella magnalingua	Nonionella sp.	Oolina exagona	Procerolagena multilatera	Pullenia quinqueloba	Rosalina globularis	Rosalina villardeboana	Stainforthia feylingi	stainforthia sp.	Trifarina angulosa	Miliammina oblonga	Pyrgo depressa	Pyrgo williamsoni	Quinqueloculina seminula	Quinqueloculina sp.	Quinqueloculina venusta	Quinqueloculina Weaveri	Labrospira jeffreysii	Miliammina arenacea	Paratrochammina bartrami	Paratrochammina tricamerata	Portatrochammina antarctica	Portatrochammina bipolaris	Paratrochammina Nana	Pseudotrochammina arenacea	Rhumblerella sp.	Trochammina multiloculata	Neogloboquadrina pachyderma	TOTAL Benthic
XV	1-2	1.5	-66	0	0	0	0	0	0	0	0	0	0	0	0	0	0	0	0	0	0	0	0	0	0	0	0	0	0	0	0	0	0	0	0	0	0	0	0	0	0	0	0	0	0	0	0	0	0
XV	10-11	10.5	-26	0	0	0	0	0	0	0	0	1	0	0	0	0	0	0	0	0	0	0	0	0	0	0	0	0	0	0	0	0	0	0	0	0	0	0	0	1	0	1	0	0	0	0	0	1	3
XV	15-16	15.5	50	0	0	0	0	0	0	0	0	26	0	0	1	0	0	0	0	0	0	0	0	0	0	0	0	0	0	1	0	0	0	0	0	0	0	2	0	3	0	7	0	0	0	0	0	5	40
XV	20-21	20.5	145	0	0	0	0	0	0	0	0	8	0	0	1	0	0	0	0	0	0	0	0	0	0	0	0	0	0	0	0	0	0	0	0	0	0	0	0	3	0	1	0	0	0	0	0	0	13
XV	25-26	25.5	258	0	0	0	0	0	0	0	0	0	0	0	1	0	0	0	0	0	0	0	0	0	0	0	0	0	0	0	0	0	0	0	0	0	0	0	1	1	0	2	0	0	0	0	0	1	5
XV	30-31	30.5	372	0	0	0	0	0	0	0	0	1	0	0	0	0	0	0	0	0	0	0	0	0	0	0	0	0	0	0	0	0	0	0	0	0	0	0	0	2	0	0	0	0	0	0	0	0	3
xV	35-36	35.5	478	0	0	0	0	0	0	0	0	12	0	0	2	0	0	0	0	0	0	0	0	0	0	0	0	0	0	4	0	0	0	0	0	0	0	3	2	2	0	2	0	0	0	0	0	1	27
XV	40-41	40.5	580	1	0	0	0	0	0	0	0	12	0	0	1	0	0	0	0	0	0	0	0	0	0	0	0	0	0	2	1	0	0	0	0	0	0	4	1	4	0	5	0	0	0	0	0	8	31
XV	50-51	50.5	679	0	0	0	0	0	0	0	0	31	0	0	2	0	0	0	0	0	0	0	0	0	0	0	0	0	0	1	0	0	0	0	0	0	0	4	0	5	0	6	0	0	0	0	0	2	49
XV	60-61	60.5	691	1	0	0	0	0	0	0	0	19	0	5	0	0	0	0	0	0	0	0	0	0	0	0	0	0	0	1	0	0	0	0	0	0	0	0	1	2	0	2	0	0	0	0	0	0	31
XIV	1-2	65.5	696	0	0	0	0	0	0	0	0	0	0	0	0	0	0	0	0	0	0	0	0	0	0	0	0	0	0	0	0	0	0	0	1	0	0	0	1	9	0	5	0	0	0	0	0	0	16
XIV	10-11	74.5	708	0	0	0	0	0	0	0	0	14	0	0	2	0	0	0	0	0	0	0	0	0	0	0	0	0	0	0	0	0	0	0	0	0	0	0	1	3	0	2	0	0	0	0	0	0	22
XIV	20-21	84.5	727	0	0	0	0	0	0	0	0	0	0	0	0	0	0	0	0	0	0	0	0	0	0	0	0	0	0	0	0	0	0	0	0	0	0	0	0	1	0	0	0	0	0	0	0	0	1
XIV	30-31	94.5	748	0	0	0	0	0	0	0	0	0	0	0	0	0	0	0	0	0	0	0	0	0	0	0	0	0	0	0	0	0	0	0	0	0	0	1	0	3	1	3	0	2	0	0	0	0	10
XIV	40-41	104.5	770	0	0	0	0	0	0	0	0	0	0	0	0	0	0	0	0	0	0	0	0	0	0	0	0	0	0	0	0	0	0	0	0	0	0	0	0	6	0	4	0	3	0	0	0	0	13
XIV	50-51	114.5	793	0	0	0	0	0	0	0	0	0	0	0	0	0	0	0	0	0	0	0	0	0	0	0	0	0	0	0	0	0	0	0	0	0	0	0	0	3	0	1	0	0	0	0	0	0	4
XIV	60-61	124.5	816	0	0	0	0	0	0	0	0	0	0	0	0	0	0	0	0	0	0	0	0	0	0	0	0	0	0	0	0	0	0	0	0	0	0	0	0	2	0	3	0	0	0	0	0	0	5
XIV	70-71	134.5	838	0	0	0	0	0	0	0	0	0	0	0	0	0	0	0	0	0	0	0	0	0	0	0	0	0	0	0	0	0	0	0	0	0	0	0	0	3	0	0	0	0	0	0	0	0	3
XIV	80-81	144.5	861	0	0	0	0	0	0	0	0	0	0	0	0	0	0	0	0	0	0	0	0	0	0	0	0	0	0	0	0	0	0	0	0	0	0	2	0	2	0	8	0	2	0	0	0	0	14
XIV	89-90	153.5	881	0	0	0	0	0	0	0	0	0	0	0	0	0	0	0	0	0	0	0	0	0	0	0	0	0	0	0	0	0	0	0	0	0	0	0	0	0	0	0	0	0	0	0	0	0	0
XIII	1-2	157.5	890	0	0	0	0	0	0	0	0	0	0	0	0	0	0	0	0	0	0	0	0	0	0	0	0	0	0	0	0	0	0	0	0	0	0	1	1	2	0	5	0	0	0	0	0	0	9
XIII	10-11	166.5	910	0	0	0	0	0	0	0	0	1	0	0	0	0	0	0	0	0	0	0	0	0	0	0	0	0	0	0	0	0	0	0	0	0	0	2	1	7	0	8	0	0	0	0	0	0	19
XIII	20-21	176.5	931	0	0	0	0	0	0	0	0	0	0	0	0	0	0	0	0	0	0	0	0	0	0	0	0	0	0	0	0	0	0	0	0	0	0	5	1	10	0	5	0	0	0	1	0	0	22
XIII	30-31	186.5	953	0	0	0	0	0	0	0	0	0	0	0	0	0	0	0	0	0	0	0	0	0	0	0	0	0	0	0	0	0	0	0	0	0	0	2	0	3	0	3	0	0	0	0	0	0	8
XIII	40-41	196.5	974	0	0	0	0	0	0	0	0	1	0	0	0	0	0	0	0	0	0	0	0	0	0	0	0	0	0	0	0	0	0	0	0	0	0	2	0	0	0	0	0	0	0	0	0	0	3
XIII	50-51	206.5	995	0	0	0	0	0	0	0	0	14	0	0	0	0	0	0	0	0	0	0	0	0	0	0	0	1	0	0	0	0	0	0	0	0	0	5	0	4	0	7	0	1	0	0	0	0	32
XIII	60-61	216.5	1016	0	0	0	0	0	0	0	0	6	0	0	0	0	0	0	0	0	0	0	0	0	0	0	0	0	0	0	0	0	0	0	0	0	0	3	0	18	2	25	0	0	0	1	0	0	55
XIII	70-71	226.5	1037	0	0	0	0	0	0	0	0	11	0	0	0	0	0	0	0	0	0	0	0	0	0	0	0	3	0	2	0	0	0	0	0	0	0	4	0	4	0	1	0	0	2	0	0	1	27
XIII	80-81	236.5	1057	0	0	0	0	0	0	0	0	76	0	0	1	0	0	0	0	0	0	0	0	0	0	0	0	2	0	0	0	0	0	0	0	0	0	2	0	1	0	0	0	0	0	0	0	2	82
XIII	90-91	246.5	1076	0	0	0	0	0	0	0	0	10	0	0	1	0	0	0	0	0	0	0	0	0	0	0	0	0	0	0	0	0	0	0	0	0	0	2	0	5	0	3	2	0	0	0	0	0	23
XII	1-2	254.5	1091	0	0	0	0	0	0	0	0	0	0	0	0	0	0	0	0	0	0	0	0	0	0	0	0	0	0	0	0	0	0	0	0	0	0	3	1	3	1	5	0	0	0	0	0	0	13
XII	10-11	264.5	1109	0	0	0	0	0	0	0	0	0	0	0	0	0	0	0	0	0	0	0	0	0	0	0	0	0	0	0	0	0	0	0	0	0	0	3	1	7	0	4	0	1	0	0	0	0	16
XII	20-21	274.5	1129	0	0	0	0	0	0	0	0	0	0	0	0	0	0	0	0	0	0	0	0	0	0	0	0	0	0	0	0	0	0	0	0	0	0	3	1	4	0	6	0	0	0	0	0	1	14
XII	30-31	284.5	1148	0	0	0	0	0	0	0	0	0	0	0	0	0	0	0	0	0	0	0	0	0	0	0	0	0	0	0	0	0	0	0	0	0	0	3	0	2	0	1	0	2	0	0	0	0	8
XII	40-41	294.5	1167	0	0	0	0	0	0	0	0	2	0	0	0	0	0	0	0	0	0	0	0	0	0	0	0	0	0	0	0	0	0	0	0	0	0	4	0	1	0	6	0	0	0	0	0	0	13
XII	50-51	304.5	1186	0	0	0	0	0	0	0	0	48	0	15	2	0	0	0	0	0	0	0	0	0	0	0	0	1	0	0	0	0	0	1	0	0	0	2	0	0	0	1	0	0	0	0	0	0	70
XII	60-61	314.5	1205	0	0	0	0	0	0	1	0	62	0	0	3	0	0	0	0	0	0	0	0	0	0	0	1	2	0	0	0	0	0	0	0	0	0	1	1	8	0	5	0	0	0	0	0	6	84
XII	70-71	324.5	1225	0	0	0	0	0	1	0	0	24	0	0	0	0	0	0	0	0	0	0	0	0	0	0	0	2	0	0	0	0	0	0	0	0	0	9	0	1	0	3	0	0	0	0	0	2	40
XII	80-81	334.5	1245	0	0	0	0	0	0	0	0	8	0	0	1	0	0	0	0	1	0	0	0	0	0	0	0	0	0	0	0	0	0	0	0	0	0	1	0	3	0	3	0	0	0	0	0	1	17
XII	90-91	344.5	1264	0	1	0	0	0	0	0	0	57	0	0	0	0	0	0	0	0	0	0	0	0	0	0	0	1	0	0	0	0	0	0	0	0	0	1	0	0	0	2	0	0	0	0	0	2	62
XI	1-2	352.5	1279	0	0	0	0	0	0	0	0	20	0	0	2	0	0	0	0	0	0	0	0	0	0	0	0	1	0	0	0	0	0	0	0	0	0	3	0	6	0	6	0	0	0	0	0	0	38
XI	10-11	361.5	1297	0	0	0	0	0	0	0	0	0	0	0	0	0	0	0	0	0	0	0	0	0	0	0	0	0	0	0	0	0	0	0	0	0	0	2	1	4	0	12	0	0	0	0	0	0	19
XI	20-21	371.5	1317	0	1	0	0	0	0	0	0	6	0	0	0	0	0	0	0	0	0	0	0	0	0	0	0	0	0	1	0	0	0	0	0	0	1	3	1	6	0	4	0	0	0	0	0	0	23
XI	30-31	381.5	1336	0	0	0	0	0	0	0	0	49	0	0	14	0	0	0	0	0	0	0	0	0	0	0	0	2	0	0	0	0	0	0	0	0	0	1	1	0	0	1	0	0	0	0	0	4	68
XI	40-41	391.5	1356	0	0	0	0	0	0	0	0	40	0	0	3	0	0	0	0	0	0	0	0	0	0	0	0	0	0	0	0	0	0	0	0	0	0	0	1	5	0	1	0	1	0	0	0	0	51
XI	50-51	401.5	1375	0	0	0	0	0	0	0	0	4	0	0	1	0	0	0	0	0	0	0	0	0	0	1	0	0	0	1	0	0	0	0	0	0	0	2	0	4	0	4	0	0	0	0	0	1	17
XI	60-61	411.5	1394	0	2	0	0	0	0	0	0	155	0	0	3	0	0	0	0	0	0	0	0	0	0	0	0	8	0	0	0	0	0	0	0	0	0	4	3	7	1	2	0	0	0	0	0	1	185
XI	70-71	421.5	1414	0	0	2	0	0	0	0	0	22	0	0	9	0	0	0	3	1	0	0	0	0	0	0	0	0	0	1	0	0	0	0	0	0	0	0	1	6	1	1	0	2	0	0	0	5	49
XI	80-81	431.5	1432	0	1	0	0	0	0	0	0	38	1	0	4	0	0	0	0	0	0	0	0	0	0	0	0	0	0	1	0	0	0	0	0	0	0	6	0	9	0	5	0	0	0	0	0	2	65
XI	90-91	441.5	1452	0	0	0	0	0	0	0	0	66	0	0	1	0	0	1	0	0	0	0	0	2	0	0	0	5	0	0	0	0	0	0	0	0	0	1	9	4	0	13	0	0	0	0	0	0	102
X	1-2	451.5	1470	0	0	0	0	0	0	0	0	57	0	0	2	0	0	0	0	0	0	0	0	0	0	0	0	0	0	0	0	0	0	0	0	0	0	1	2	3	0	8	0	1	0	0	0	2	74
X	10-11	460.5	1486	0	0	0	0	0	0	0	0	105	0	0	0	0	0	0	0	0	0	0	0	0	0	0	0	3	0	0	0	0	0	0	0	0	0	5	1	0	0	1	0	1	0	0	0	1	116
X	20-21	470.5	1507	0	1	0	0	1	1	0	0	26	0	0	9	0	0	0	1	0	0	0	0	0	0	2	0	0	0	2	0	0	0	0	0	0	0	1	0	0	0	0	0	0	0	0	0	3	44
X	30-31	480.5	1533	0	0	0	0	0	0	0	0	28	0	0	27	0	0	0	0	1	0	0	0	0	0	1	0	1	0	0	0	0	0	0	0	1	0	3	0	0	0	2	0	1	0	0	0	2	65
X	40-41	490.5	1559	0	0	0	0	1	1	0	0	50	2	0	29	0	0	0	0	1	0	0	0	0	0	0	0	0	0	0	0	0	0	0	0	0	0	1	0	3	0	2	0	0	0	0	0	6	90
X	50-51	500.5	1585	0	0	0	0	0	0	0	0	61	3	0	15	0	0	0	0	1	0	1	0	0	0	0	0	1	0	2	0	1	0	0	0	0	0	2	0	1	0	6	0	0	0	0	0	0	94
X	60-61	510.5	1610	0	0	0	0	1	0	0	1	43	0	0	17	0	0	0	0	1	0	0	1	0	0	0	0	0	0	0	0	0	0	0	0	0	0	3	1	1	0	2	0	0	0	0	0	12	71
X	70-71	520.5	1663	0	0	0	0	1	0	0	0	18	0	1	11	0	0	0	0	0	0	0	0	0	0	0	0	0	0	0	0	0	1	0	0	0	0	0	0	0	0	1	0	1	0	0	0	0	34
X	80 -81	530.5	1697	0	0	0	0	0	1	0	0	195	1	0	18	0	0	0	0	0	0	0	0	0	0	0	0	0	0	3	0	0	0	0	0	0	0	4	0	1	0	0	0	0	0	0	0	3	223
X	90-91	540.5	1721	0	0	0	0	0	0	0	0	10	0	0	23	0	0	0	0	3	0	0	0	0	0	0	0	0	0	1	0	1	0	0	0	0	0	1	0	0	0	3	0	0	0	0	0	13	42
IX	1-2	552.5	1749	0	0	0	0	2	1	0	0	22	0	0	23	0	0	1	0	1	0	0	0	0	0	0	0	0	0	0	0	0	0	0	1	0	0	2	0	5	0	4	0	0	0	0	0	16	62
IX	10-11	561.5	1772	0	0	0	0	0	0	0	0	32	0	0	10	0	0	0	0	0	0	0	0	0	0	0	0	2	0	0	0	0	0	0	0	0	0	3	1	2	0	1	0	0	0	0	0	0	51
IX	20-21	571.5	1797	0	0	0	0	0	1	0	0	67	0	0	9	0	0	0	0	0	0	0	0	0	0	0	0	0	0	0	0	0	0	0	0	0	0	3	1	3	0	0	0	0	0	0	0	0	84
IX	30-31	581.5	1824	0	0	0	1	1	0	0	0	26	0	0	16	0	0	0	1	0	0	0	0	0	0	0	0	1	0	0	0	0	0	0	0	0	0	1	0	1	0	0	0	2	0	0	0	4	50
IX	40-41	591.5	1851	0	0	0	0	0	0	0	0	131	0	0	14	0	0	0	0	0	0	0	0	0	0	0	0	3	0	1	0	0	0	0	0	0	0	3	0	6	0	6	0	1	0	0	0	2	165
IX	50-51	601.5	1878	0	1	2	0	3	6	0	1	256	17	0	45	0	0	0	2	3	1	1	0	0	2	1	0	0	0	10	0	0	0	0	1	0	0	2	0	4	0	9	0	0	0	0	0	35	367
IX	60-61	611.5	1905	2	1	0	1	0	0	0	0	153	4	0	20	0	1	0	3	1	0	0	0	0	0	0	0	3	1	4	0	0	0	0	1	0	0	0	0	0	0	4	0	0	0	0	0	5	199
IX	70-71	621.5	1932	0	0	0	0	0	0	0	0	15	0	0	3	1	0	0	0	0	0	0	0	0	0	1	0	2	0	0	0	0	0	0	0	0	0	0	1	6	0	4	0	0	0	0	0	4	33
IX	80-81	631.5	1960	0	0	0	0	5	0	1	0	528	1	0	5	0	0	0	1	0	0	0	0	0	0	0	0	4	0	5	0	0	0	0	0	0	0	2	0	9	4	13	0	0	0	0	0	25	578
IX	90-91	641.5	1987	0	2	0	0	1	7	1	0	243	0	0	20	0	1	0	6	6	3	0	0	0	1	0	0	11	0	6	0	0	0	0	0	0	0	4	3	5	0	10	0	0	0	0	1	35	331
IX	99-100	650.5	2012	0	0	0	0	0	0	0	0	64	0	0	1	0	0	0	0	0	0	0	0	0	0	0	0	0	0	2	0	0	0	0	0	0	0	4	0	5	0	1	0	0	0	0	0	6	77

## Sheet: Concentration
section	interval (cm)	Cumulative depth(cm)	Age (yrs BP)	Astrononion echolsi	Astrononion antarticum	Cassidulinoides porrectus	Cibicides lobatulus	Cibicides refulgens	Epistominella exigua	Fissurina semimarginata	Fissurina sp.	Globocassidulina biora	Globocassidulina crassa	Globocassidulina sp.	Globocassidulina subglobosa	Heronallenia Kempii	Hyalinonetrion sahulense	Melonis barleanum	Nonionella bradii	Nonionella iridea	Nonionella magnalingua	Nonionella sp.	Oolina exagona	Procerolagena multilatera	Pullenia quinqueloba	Rosalina globularis	Rosalina villardeboana	Stainforthia feylingi	stainforthia sp.	Trifarina angulosa	Miliammina oblonga	Pyrgo depressa	Pyrgo williamsoni	Quinqueloculina seminula	Quinqueloculina sp.	Quinqueloculina venusta	Quinqueloculina Weaveri	Labrospira jeffreysii	Miliammina arenacea	Paratrochammina bartrami	Paratrochammina tricamerata	Portatrochammina antarctica	Portatrochammina bipolaris	Paratrochammina Nana	Pseudotrochammina arenacea	Rhumblerella sp.	Trochammina multiloculata	Neogloboquadrina pachyderma	TOTAL Benthic
XV	1-2	1.5	-66	0	0	0	0	0	0	0	0	0	0	0	0	0	0	0	0	0	0	0	0	0	0	0	0	0	0	0	0	0	0	0	0	0	0	0	0	0	0	0	0	0	0	0	0	0
XV	10-11	10.5	-26	0	0	0	0	0	0	0	0	3.03214	0	0	0	0	0	0	0	0	0	0	0	0	0	0	0	0	0	0	0	0	0	0	0	0	0	0	0	3.03214	0	3.03214	0	0	0	0	0	3.03214
XV	15-16	15.5	50	0	0	0	0	0	0	0	0	7.76119	0	0	0.298507	0	0	0	0	0	0	0	0	0	0	0	0	0	0	0.298507	0	0	0	0	0	0	0	0.597015	0	0.895522	0	2.08955	0	0	0	0	0	1.49254
XV	20-21	20.5	145	0	0	0	0	0	0	0	0	9.1954	0	0	1.14943	0	0	0	0	0	0	0	0	0	0	0	0	0	0	0	0	0	0	0	0	0	0	0	0	3.44828	0	1.14943	0	0	0	0	0	0
XV	25-26	25.5	258	0	0	0	0	0	0	0	0	0	0	0	11.8765	0	0	0	0	0	0	0	0	0	0	0	0	0	0	0	0	0	0	0	0	0	0	0	11.8765	11.8765	0	23.753	0	0	0	0	0	11.8765
XV	30-31	30.5	372	0	0	0	0	0	0	0	0	3.27869	0	0	0	0	0	0	0	0	0	0	0	0	0	0	0	0	0	0	0	0	0	0	0	0	0	0	0	6.55738	0	0	0	0	0	0	0	0
xV	35-36	35.5	478	0	0	0	0	0	0	0	0	9.72211	0	0	1.62035	0	0	0	0	0	0	0	0	0	0	0	0	0	0	3.2407	0	0	0	0	0	0	0	2.43053	1.62035	1.62035	0	1.62035	0	0	0	0	0	0.810176
XV	40-41	40.5	580	0.990863	0	0	0	0	0	0	0	11.9451	0	0	0.995421	0	0	0	0	0	0	0	0	0	0	0	0	0	0	1.99084	0.995421	0	0	0	0	0	0	3.98168	0.995421	3.98168	0	4.97711	0	0	0	0	0	7.96337
XV	50-51	50.5	679	0	0	0	0	0	0	0	0	72.4807	0	0	4.67617	0	0	0	0	0	0	0	0	0	0	0	0	0	0	2.33809	0	0	0	0	0	0	0	9.35235	0	11.6904	0	14.0285	0	0	0	0	0	4.67617
XV	60-61	60.5	691	2.41342	0	0	0	0	0	0	0	29.5169	0	7.76759	0	0	0	0	0	0	0	0	0	0	0	0	0	0	0	1.55352	0	0	0	0	0	0	0	0	1.55352	3.10704	0	3.10704	0	0	0	0	0	0
XIV	1-2	65.5	696	0	0	0	0	0	0	0	0	0	0	0	0	0	0	0	0	0	0	0	0	0	0	0	0	0	0	0	0	0	0	0	1.47059	0	0	0	1.47059	13.2353	0	7.35294	0	0	0	0	0	0
XIV	10-11	74.5	708	0	0	0	0	0	0	0	0	46.6978	0	0	6.67111	0	0	0	0	0	0	0	0	0	0	0	0	0	0	0	0	0	0	0	0	0	0	0	3.33556	10.0067	0	6.67111	0	0	0	0	0	0
XIV	20-21	84.5	727	0	0	0	0	0	0	0	0	0	0	0	0	0	0	0	0	0	0	0	0	0	0	0	0	0	0	0	0	0	0	0	0	0	0	0	0	7.88022	0	0	0	0	0	0	0	0
XIV	30-31	94.5	748	0	0	0	0	0	0	0	0	0	0	0	0	0	0	0	0	0	0	0	0	0	0	0	0	0	0	0	0	0	0	0	0	0	0	2.04082	0	6.12245	2.04082	6.12245	0	4.08163	0	0	0	0
XIV	40-41	104.5	770	0	0	0	0	0	0	0	0	0	0	0	0	0	0	0	0	0	0	0	0	0	0	0	0	0	0	0	0	0	0	0	0	0	0	0	0	49.3827	0	32.9218	0	24.6914	0	0	0	0
XIV	50-51	114.5	793	0	0	0	0	0	0	0	0	0	0	0	0	0	0	0	0	0	0	0	0	0	0	0	0	0	0	0	0	0	0	0	0	0	0	0	0	8.43645	0	2.81215	0	0	0	0	0	0
XIV	60-61	124.5	816	0	0	0	0	0	0	0	0	0	0	0	0	0	0	0	0	0	0	0	0	0	0	0	0	0	0	0	0	0	0	0	0	0	0	0	0	5.11509	0	7.67263	0	0	0	0	0	0
XIV	70-71	134.5	838	0	0	0	0	0	0	0	0	0	0	0	0	0	0	0	0	0	0	0	0	0	0	0	0	0	0	0	0	0	0	0	0	0	0	0	0	14.5068	0	0	0	0	0	0	0	0
XIV	80-81	144.5	861	0	0	0	0	0	0	0	0	0	0	0	0	0	0	0	0	0	0	0	0	0	0	0	0	0	0	0	0	0	0	0	0	0	0	4.68274	0	4.68274	0	18.731	0	4.68274	0	0	0	0
XIV	89-90	153.5	881	0	0	0	0	0	0	0	0	0	0	0	0	0	0	0	0	0	0	0	0	0	0	0	0	0	0	0	0	0	0	0	0	0	0	0	0	0	0	0	0	0	0	0	0	0
XIII	1-2	157.5	890	0	0	0	0	0	0	0	0	0	0	0	0	0	0	0	0	0	0	0	0	0	0	0	0	0	0	0	0	0	0	0	0	0	0	3.72856	3.72856	7.45712	0	18.6428	0	0	0	0	0	0
XIII	10-11	166.5	910	0	0	0	0	0	0	0	0	1.96078	0	0	0	0	0	0	0	0	0	0	0	0	0	0	0	0	0	0	0	0	0	0	0	0	0	3.92157	1.96078	13.7255	0	15.6863	0	0	0	0	0	0
XIII	20-21	176.5	931	0	0	0	0	0	0	0	0	0	0	0	0	0	0	0	0	0	0	0	0	0	0	0	0	0	0	0	0	0	0	0	0	0	0	7.38662	1.47732	14.7732	0	7.38662	0	0	0	1.47732	0	0
XIII	30-31	186.5	953	0	0	0	0	0	0	0	0	0	0	0	0	0	0	0	0	0	0	0	0	0	0	0	0	0	0	0	0	0	0	0	0	0	0	9.03342	0	13.5501	0	13.5501	0	0	0	0	0	0
XIII	40-41	196.5	974	0	0	0	0	0	0	0	0	15.7233	0	0	0	0	0	0	0	0	0	0	0	0	0	0	0	0	0	0	0	0	0	0	0	0	0	31.4465	0	0	0	0	0	0	0	0	0	0
XIII	50-51	206.5	995	0	0	0	0	0	0	0	0	29.4489	0	0	0	0	0	0	0	0	0	0	0	0	0	0	0	2.10349	0	0	0	0	0	0	0	0	0	10.5175	0	8.41397	0	14.7244	0	2.10349	0	0	0	0
XIII	60-61	216.5	1016	0	0	0	0	0	0	0	0	6.1862	0	0	0	0	0	0	0	0	0	0	0	0	0	0	0	0	0	0	0	0	0	0	0	0	0	3.0931	0	18.5586	2.06207	25.7759	0	0	0	1.03103	0	0
XIII	70-71	226.5	1037	0	0	0	0	0	0	0	0	27.3836	0	0	0	0	0	0	0	0	0	0	0	0	0	0	0	7.46826	0	4.97884	0	0	0	0	0	0	0	9.95768	0	9.95768	0	2.48942	0	0	4.97884	0	0	2.48942
XIII	80-81	236.5	1057	0	0	0	0	0	0	0	0	351.039	0	0	4.61894	0	0	0	0	0	0	0	0	0	0	0	0	9.23788	0	0	0	0	0	0	0	0	0	9.23788	0	4.61894	0	0	0	0	0	0	0	9.23788
XIII	90-91	246.5	1076	0	0	0	0	0	0	0	0	7.12099	0	0	0.712099	0	0	0	0	0	0	0	0	0	0	0	0	0	0	0	0	0	0	0	0	0	0	1.4242	0	3.56049	0	2.1363	1.4242	0	0	0	0	0
XII	1-2	254.5	1091	0	0	0	0	0	0	0	0	0	0	0	0	0	0	0	0	0	0	0	0	0	0	0	0	0	0	0	0	0	0	0	0	0	0	4.56274	1.52091	4.56274	1.52091	7.60456	0	0	0	0	0	0
XII	10-11	264.5	1109	0	0	0	0	0	0	0	0	0	0	0	0	0	0	0	0	0	0	0	0	0	0	0	0	0	0	0	0	0	0	0	0	0	0	6.25652	2.08551	14.5985	0	8.34202	0	2.08551	0	0	0	0
XII	20-21	274.5	1129	0	0	0	0	0	0	0	0	0	0	0	0	0	0	0	0	0	0	0	0	0	0	0	0	0	0	0	0	0	0	0	0	0	0	4.10397	1.36799	5.47196	0	8.20793	0	0	0	0	0	1.36799
XII	30-31	284.5	1148	0	0	0	0	0	0	0	0	0	0	0	0	0	0	0	0	0	0	0	0	0	0	0	0	0	0	0	0	0	0	0	0	0	0	3.66748	0	2.44499	0	1.22249	0	2.44499	0	0	0	0
XII	40-41	294.5	1167	0	0	0	0	0	0	0	0	2.88309	0	0	0	0	0	0	0	0	0	0	0	0	0	0	0	0	0	0	0	0	0	0	0	0	0	5.76618	0	1.44155	0	8.64927	0	0	0	0	0	0
XII	50-51	304.5	1186	0	0	0	0	0	0	0	0	104.054	0	32.5168	4.33557	0	0	0	0	0	0	0	0	0	0	0	0	2.16779	0	0	0	0	0	2.16779	0	0	0	4.33557	0	0	0	2.16779	0	0	0	0	0	0
XII	60-61	314.5	1205	0	0	0	0	0	0	2.4919	0	154.498	0	0	7.4757	0	0	0	0	0	0	0	0	0	0	0	2.4919	4.9838	0	0	0	0	0	0	0	0	0	2.4919	2.4919	19.9352	0	12.4595	0	0	0	0	0	14.9514
XII	70-71	324.5	1225	0	0	0	0	0	1.34192	0	0	32.2061	0	0	0	0	0	0	0	0	0	0	0	0	0	0	0	2.68384	0	0	0	0	0	0	0	0	0	12.0773	0	1.34192	0	4.02576	0	0	0	0	0	2.68384
XII	80-81	334.5	1245	0	0	0	0	0	0	0	0	22.7144	0	0	2.8393	0	0	0	0	2.8393	0	0	0	0	0	0	0	0	0	0	0	0	0	0	0	0	0	2.8393	0	8.51789	0	8.51789	0	0	0	0	0	2.8393
XII	90-91	344.5	1264	0	3.68053	0	0	0	0	0	0	209.79	0	0	0	0	0	0	0	0	0	0	0	0	0	0	0	3.68053	0	0	0	0	0	0	0	0	0	3.68053	0	0	0	7.36106	0	0	0	0	0	7.36106
XI	1-2	352.5	1279	0	0	0	0	0	0	0	0	20.674	0	0	2.0674	0	0	0	0	0	0	0	0	0	0	0	0	1.0337	0	0	0	0	0	0	0	0	0	3.1011	0	6.20219	0	6.20219	0	0	0	0	0	0
XI	10-11	361.5	1297	0	0	0	0	0	0	0	0	0	0	0	0	0	0	0	0	0	0	0	0	0	0	0	0	0	0	0	0	0	0	0	0	0	0	2.70966	1.35483	5.41932	0	16.258	0	0	0	0	0	0
XI	20-21	371.5	1317	0	2.23164	0	0	0	0	0	0	13.3899	0	0	0	0	0	0	0	0	0	0	0	0	0	0	0	0	0	2.23164	0	0	0	0	0	0	2.23164	6.69493	2.23164	13.3899	0	8.92658	0	0	0	0	0	0
XI	30-31	381.5	1336	0	0	0	0	0	0	0	0	168.791	0	0	48.226	0	0	0	0	0	0	0	0	0	0	0	0	6.88942	0	0	0	0	0	0	0	0	0	3.44471	3.44471	0	0	3.44471	0	0	0	0	0	13.7788
XI	40-41	391.5	1356	0	0	0	0	0	0	0	0	260.926	0	0	19.5695	0	0	0	0	0	0	0	0	0	0	0	0	0	0	0	0	0	0	0	0	0	0	0	6.52316	32.6158	0	6.52316	0	6.52316	0	0	0	0
XI	50-51	401.5	1375	0	0	0	0	0	0	0	0	12.184	0	0	3.04599	0	0	0	0	0	0	0	0	0	0	3.04599	0	0	0	3.04599	0	0	0	0	0	0	0	6.09199	0	12.184	0	12.184	0	0	0	0	0	3.04599
XI	60-61	411.5	1394	0	3.27065	0	0	0	0	0	0	253.475	0	0	4.90597	0	0	0	0	0	0	0	0	0	0	0	0	13.0826	0	0	0	0	0	0	0	0	0	6.54129	4.90597	11.4473	1.63532	3.27065	0	0	0	0	0	1.63532
XI	70-71	421.5	1414	0	0	6.11247	0	0	0	0	0	67.2372	0	0	27.5061	0	0	0	9.1687	3.05623	0	0	0	0	0	0	0	0	0	3.05623	0	0	0	0	0	0	0	0	3.05623	18.3374	3.05623	3.05623	0	6.11247	0	0	0	15.2812
XI	80-81	431.5	1432	0	3.48918	0	0	0	0	0	0	132.589	3.48918	0	13.9567	0	0	0	0	0	0	0	0	0	0	0	0	0	0	3.48918	0	0	0	0	0	0	0	20.9351	0	31.4027	0	17.4459	0	0	0	0	0	6.97837
XI	90-91	441.5	1452	0	0	0	0	0	0	0	0	65.6716	0	0	0.995025	0	0	0.995025	0	0	0	0	0	1.99005	0	0	0	4.97512	0	0	0	0	0	0	0	0	0	0.995025	8.95522	3.9801	0	12.9353	0	0	0	0	0	0
X	1-2	451.5	1470	0	0	0	0	0	0	0	0	64.5015	0	0	2.26321	0	0	0	0	0	0	0	0	0	0	0	0	0	0	0	0	0	0	0	0	0	0	1.13161	2.26321	3.39482	0	9.05285	0	1.13161	0	0	0	2.26321
X	10-11	460.5	1486	0	0	0	0	0	0	0	0	119.156	0	0	0	0	0	0	0	0	0	0	0	0	0	0	0	3.40445	0	0	0	0	0	0	0	0	0	5.67408	1.13482	0	0	1.13482	0	1.13482	0	0	0	1.13482
X	20-21	470.5	1507	0	4.05022	0	0	4.05022	4.05022	0	0	105.306	0	0	36.452	0	0	0	4.05022	0	0	0	0	0	0	8.10045	0	0	0	8.10045	0	0	0	0	0	0	0	4.05022	0	0	0	0	0	0	0	0	0	12.1507
X	30-31	480.5	1533	0	0	0	0	0	0	0	0	139.027	0	0	134.062	0	0	0	0	4.96524	0	0	0	0	0	4.96524	0	4.96524	0	0	0	0	0	0	0	4.96524	0	14.8957	0	0	0	9.93049	0	4.96524	0	0	0	9.93049
X	40-41	490.5	1559	0	0	0	0	2.18962	2.18962	0	0	109.481	4.37924	0	63.499	0	0	0	0	2.18962	0	0	0	0	0	0	0	0	0	0	0	0	0	0	0	0	0	2.18962	0	6.56886	0	4.37924	0	0	0	0	0	13.1377
X	50-51	500.5	1585	0	0	0	0	0	0	0	0	101.904	5.01169	0	25.0585	0	0	0	0	1.67056	0	1.67056	0	0	0	0	0	1.67056	0	3.34113	0	1.67056	0	0	0	0	0	3.34113	0	1.67056	0	10.0234	0	0	0	0	0	0
X	60-61	510.5	1610	0	0	0	0	4.06009	0	0	4.06009	174.584	0	0	69.0215	0	0	0	0	4.06009	0	0	4.06009	0	0	0	0	0	0	0	0	0	0	0	0	0	0	12.1803	4.06009	4.06009	0	8.12018	0	0	0	0	0	48.7211
X	70-71	520.5	1663	0	0	0	0	8.15661	0	0	0	146.819	0	8.15661	89.7227	0	0	0	0	0	0	0	0	0	0	0	0	0	0	0	0	0	8.15661	0	0	0	0	0	0	0	0	8.15661	0	8.15661	0	0	0	0
X	80 -81	530.5	1697	0	0	0	0	0	2.23664	0	0	436.144	2.23664	0	40.2594	0	0	0	0	0	0	0	0	0	0	0	0	0	0	6.70991	0	0	0	0	0	0	0	8.94654	0	2.23664	0	0	0	0	0	0	0	6.70991
X	90-91	540.5	1721	0	0	0	0	0	0	0	0	41.2882	0	0	94.9628	0	0	0	0	12.3865	0	0	0	0	0	0	0	0	0	4.12882	0	4.12882	0	0	0	0	0	4.12882	0	0	0	12.3865	0	0	0	0	0	53.6746
IX	1-2	552.5	1749	0	0	0	0	2.21141	1.10571	0	0	24.3255	0	0	25.4312	0	0	1.10571	0	1.10571	0	0	0	0	0	0	0	0	0	0	0	0	0	0	1.10571	0	0	2.21141	0	5.52853	0	4.42282	0	0	0	0	0	17.6913
IX	10-11	561.5	1772	0	0	0	0	0	0	0	0	99.348	0	0	31.0463	0	0	0	0	0	0	0	0	0	0	0	0	6.20925	0	0	0	0	0	0	0	0	0	9.31388	3.10463	6.20925	0	3.10463	0	0	0	0	0	0
IX	20-21	571.5	1797	0	0	0	0	0	1.0866	0	0	72.8023	0	0	9.77942	0	0	0	0	0	0	0	0	0	0	0	0	0	0	0	0	0	0	0	0	0	0	3.25981	1.0866	3.25981	0	0	0	0	0	0	0	0
IX	30-31	581.5	1824	0	0	0	5.10986	5.10986	0	0	0	132.856	0	0	81.7578	0	0	0	5.10986	0	0	0	0	0	0	0	0	5.10986	0	0	0	0	0	0	0	0	0	5.10986	0	5.10986	0	0	0	10.2197	0	0	0	20.4394
IX	40-41	591.5	1851	0	0	0	0	0	0	0	0	150.748	0	0	16.1105	0	0	0	0	0	0	0	0	0	0	0	0	3.45224	0	1.15075	0	0	0	0	0	0	0	3.45224	0	6.90449	0	6.90449	0	1.15075	0	0	0	2.3015
IX	50-51	601.5	1878	0	0.781006	1.56201	0	2.34302	4.68604	0	0.781006	199.938	13.2771	0	35.1453	0	0	0	1.56201	2.34302	0.781006	0.781006	0	0	1.56201	0.781006	0	0	0	7.81006	0	0	0	0	0.781006	0	0	1.56201	0	3.12402	0	7.02905	0	0	0	0	0	27.3352
IX	60-61	611.5	1905	1.42668	0.844595	0	0.844595	0	0	0	0	129.223	3.37838	0	16.8919	0	0.844595	0	2.53378	0.844595	0	0	0	0	0	0	0	2.53378	0.844595	3.37838	0	0	0	0	0.844595	0	0	0	0	0	0	3.37838	0	0	0	0	0	4.22297
IX	70-71	621.5	1932	0	0	0	0	0	0	0	0	21.9845	0	0	4.39689	1.46563	0	0	0	0	0	0	0	0	0	1.46563	0	2.93126	0	0	0	0	0	0	0	0	0	0	1.46563	8.79379	0	5.86252	0	0	0	0	0	5.86252
IX	80-81	631.5	1960	0	0	0	0	4.58968	0	0.917936	0	484.67	0.917936	0	4.58968	0	0	0	0.917936	0	0	0	0	0	0	0	0	3.67175	0	4.58968	0	0	0	0	0	0	0	1.83587	0	8.26143	3.67175	11.9332	0	0	0	0	0	22.9484
IX	90-91	641.5	1987	0	1.50184	0	0	0.75092	5.25644	0.75092	0	182.474	0	0	15.0184	0	0.75092	0	4.50552	4.50552	2.25276	0	0	0	0.75092	0	0	8.26012	0	4.50552	0	0	0	0	0	0	0	3.00368	2.25276	3.7546	0	7.5092	0	0	0	0	0.75092	26.2822
IX	99-100	650.5	2012	0	0	0	0	0	0	0	0	93.7729	0	0	1.4652	0	0	0	0	0	0	0	0	0	0	0	0	0	0	2.9304	0	0	0	0	0	0	0	5.86081	0	7.32601	0	1.4652	0	0	0	0	0	8.79121

## Sheet: RelativeAbundances
section	interval (cm)	Cumulative depth(cm)	Age (yrs BP)	Astrononion echolsi	Astrononion antarticum	Cassidulinoides porrectus	Cibicides lobatulus	Cibicides refulgens	Epistominella exigua	Fissurina semimarginata	Fissurina sp.	Globocassidulina biora	Globocassidulina crassa	Globocassidulina sp.	Globocassidulina subglobosa	Heronallenia Kempii	Hyalinonetrion sahulense	Melonis barleanum	Nonionella bradii	Nonionella iridea	Nonionella magnalingua	Nonionella sp.	Oolina exagona	Procerolagena multilatera	Pullenia quinqueloba	Rosalina globularis	Rosalina villardeboana	Stainforthia feylingi	stainforthia sp.	Trifarina angulosa	Miliammina oblonga	Pyrgo depressa	Pyrgo williamsoni	Quinqueloculina seminula	Quinqueloculina sp.	Quinqueloculina venusta	Quinqueloculina Weaveri	Labrospira jeffreysii	Miliammina arenacea	Paratrochammina bartrami	Paratrochammina tricamerata	Portatrochammina antarctica	Portatrochammina bipolaris	Paratrochammina Nana	Pseudotrochammina arenacea	Rhumblerella sp.	Trochammina multiloculata	Neogloboquadrina pachyderma
XV	1-2	1.5	-66	0	0	0	0	0	0	0	0	0	0	0	0	0	0	0	0	0	0	0	0	0	0	0	0	0	0	0	0	0	0	0	0	0	0	0	0	0	0	0	0	0	0	0	0	0
XV	10-11	10.5	-26	0	0	0	0	0	0	0	0	33.3333	0	0	0	0	0	0	0	0	0	0	0	0	0	0	0	0	0	0	0	0	0	0	0	0	0	0	0	33.3333	0	33.3333	0	0	0	0	0	25
XV	15-16	15.5	50	0	0	0	0	0	0	0	0	65	0	0	2.5	0	0	0	0	0	0	0	0	0	0	0	0	0	0	2.5	0	0	0	0	0	0	0	5	0	7.5	0	17.5	0	0	0	0	0	11.1111
XV	20-21	20.5	145	0	0	0	0	0	0	0	0	61.5385	0	0	7.69231	0	0	0	0	0	0	0	0	0	0	0	0	0	0	0	0	0	0	0	0	0	0	0	0	23.0769	0	7.69231	0	0	0	0	0	0
XV	25-26	25.5	258	0	0	0	0	0	0	0	0	0	0	0	20	0	0	0	0	0	0	0	0	0	0	0	0	0	0	0	0	0	0	0	0	0	0	0	20	20	0	40	0	0	0	0	0	16.6667
XV	30-31	30.5	372	0	0	0	0	0	0	0	0	33.3333	0	0	0	0	0	0	0	0	0	0	0	0	0	0	0	0	0	0	0	0	0	0	0	0	0	0	0	66.6667	0	0	0	0	0	0	0	0
xV	35-36	35.5	478	0	0	0	0	0	0	0	0	44.4444	0	0	7.40741	0	0	0	0	0	0	0	0	0	0	0	0	0	0	14.8148	0	0	0	0	0	0	0	11.1111	7.40741	7.40741	0	7.40741	0	0	0	0	0	3.57143
XV	40-41	40.5	580	3.22581	0	0	0	0	0	0	0	38.7097	0	0	3.22581	0	0	0	0	0	0	0	0	0	0	0	0	0	0	6.45161	3.22581	0	0	0	0	0	0	12.9032	3.22581	12.9032	0	16.129	0	0	0	0	0	20.5128
XV	50-51	50.5	679	0	0	0	0	0	0	0	0	63.2653	0	0	4.08163	0	0	0	0	0	0	0	0	0	0	0	0	0	0	2.04082	0	0	0	0	0	0	0	8.16327	0	10.2041	0	12.2449	0	0	0	0	0	3.92157
XV	60-61	60.5	691	3.22581	0	0	0	0	0	0	0	61.2903	0	16.129	0	0	0	0	0	0	0	0	0	0	0	0	0	0	0	3.22581	0	0	0	0	0	0	0	0	3.22581	6.45161	0	6.45161	0	0	0	0	0	0
XIV	1-2	65.5	696	0	0	0	0	0	0	0	0	0	0	0	0	0	0	0	0	0	0	0	0	0	0	0	0	0	0	0	0	0	0	0	6.25	0	0	0	6.25	56.25	0	31.25	0	0	0	0	0	0
XIV	10-11	74.5	708	0	0	0	0	0	0	0	0	63.6364	0	0	9.09091	0	0	0	0	0	0	0	0	0	0	0	0	0	0	0	0	0	0	0	0	0	0	0	4.54545	13.6364	0	9.09091	0	0	0	0	0	0
XIV	20-21	84.5	727	0	0	0	0	0	0	0	0	0	0	0	0	0	0	0	0	0	0	0	0	0	0	0	0	0	0	0	0	0	0	0	0	0	0	0	0	100	0	0	0	0	0	0	0	0
XIV	30-31	94.5	748	0	0	0	0	0	0	0	0	0	0	0	0	0	0	0	0	0	0	0	0	0	0	0	0	0	0	0	0	0	0	0	0	0	0	10	0	30	10	30	0	20	0	0	0	0
XIV	40-41	104.5	770	0	0	0	0	0	0	0	0	0	0	0	0	0	0	0	0	0	0	0	0	0	0	0	0	0	0	0	0	0	0	0	0	0	0	0	0	46.1538	0	30.7692	0	23.0769	0	0	0	0
XIV	50-51	114.5	793	0	0	0	0	0	0	0	0	0	0	0	0	0	0	0	0	0	0	0	0	0	0	0	0	0	0	0	0	0	0	0	0	0	0	0	0	75	0	25	0	0	0	0	0	0
XIV	60-61	124.5	816	0	0	0	0	0	0	0	0	0	0	0	0	0	0	0	0	0	0	0	0	0	0	0	0	0	0	0	0	0	0	0	0	0	0	0	0	40	0	60	0	0	0	0	0	0
XIV	70-71	134.5	838	0	0	0	0	0	0	0	0	0	0	0	0	0	0	0	0	0	0	0	0	0	0	0	0	0	0	0	0	0	0	0	0	0	0	0	0	100	0	0	0	0	0	0	0	0
XIV	80-81	144.5	861	0	0	0	0	0	0	0	0	0	0	0	0	0	0	0	0	0	0	0	0	0	0	0	0	0	0	0	0	0	0	0	0	0	0	14.2857	0	14.2857	0	57.1429	0	14.2857	0	0	0	0
XIV	89-90	153.5	881	0	0	0	0	0	0	0	0	0	0	0	0	0	0	0	0	0	0	0	0	0	0	0	0	0	0	0	0	0	0	0	0	0	0	0	0	0	0	0	0	0	0	0	0	0
XIII	1-2	157.5	890	0	0	0	0	0	0	0	0	0	0	0	0	0	0	0	0	0	0	0	0	0	0	0	0	0	0	0	0	0	0	0	0	0	0	11.1111	11.1111	22.2222	0	55.5556	0	0	0	0	0	0
XIII	10-11	166.5	910	0	0	0	0	0	0	0	0	5.26316	0	0	0	0	0	0	0	0	0	0	0	0	0	0	0	0	0	0	0	0	0	0	0	0	0	10.5263	5.26316	36.8421	0	42.1053	0	0	0	0	0	0
XIII	20-21	176.5	931	0	0	0	0	0	0	0	0	0	0	0	0	0	0	0	0	0	0	0	0	0	0	0	0	0	0	0	0	0	0	0	0	0	0	22.7273	4.54545	45.4545	0	22.7273	0	0	0	4.54545	0	0
XIII	30-31	186.5	953	0	0	0	0	0	0	0	0	0	0	0	0	0	0	0	0	0	0	0	0	0	0	0	0	0	0	0	0	0	0	0	0	0	0	25	0	37.5	0	37.5	0	0	0	0	0	0
XIII	40-41	196.5	974	0	0	0	0	0	0	0	0	33.3333	0	0	0	0	0	0	0	0	0	0	0	0	0	0	0	0	0	0	0	0	0	0	0	0	0	66.6667	0	0	0	0	0	0	0	0	0	0
XIII	50-51	206.5	995	0	0	0	0	0	0	0	0	43.75	0	0	0	0	0	0	0	0	0	0	0	0	0	0	0	3.125	0	0	0	0	0	0	0	0	0	15.625	0	12.5	0	21.875	0	3.125	0	0	0	0
XIII	60-61	216.5	1016	0	0	0	0	0	0	0	0	10.9091	0	0	0	0	0	0	0	0	0	0	0	0	0	0	0	0	0	0	0	0	0	0	0	0	0	5.45455	0	32.7273	3.63636	45.4545	0	0	0	1.81818	0	0
XIII	70-71	226.5	1037	0	0	0	0	0	0	0	0	40.7407	0	0	0	0	0	0	0	0	0	0	0	0	0	0	0	11.1111	0	7.40741	0	0	0	0	0	0	0	14.8148	0	14.8148	0	3.7037	0	0	7.40741	0	0	3.57143
XIII	80-81	236.5	1057	0	0	0	0	0	0	0	0	92.6829	0	0	1.21951	0	0	0	0	0	0	0	0	0	0	0	0	2.43902	0	0	0	0	0	0	0	0	0	2.43902	0	1.21951	0	0	0	0	0	0	0	2.38095
XIII	90-91	246.5	1076	0	0	0	0	0	0	0	0	43.4783	0	0	4.34783	0	0	0	0	0	0	0	0	0	0	0	0	0	0	0	0	0	0	0	0	0	0	8.69565	0	21.7391	0	13.0435	8.69565	0	0	0	0	0
XII	1-2	254.5	1091	0	0	0	0	0	0	0	0	0	0	0	0	0	0	0	0	0	0	0	0	0	0	0	0	0	0	0	0	0	0	0	0	0	0	23.0769	7.69231	23.0769	7.69231	38.4615	0	0	0	0	0	0
XII	10-11	264.5	1109	0	0	0	0	0	0	0	0	0	0	0	0	0	0	0	0	0	0	0	0	0	0	0	0	0	0	0	0	0	0	0	0	0	0	18.75	6.25	43.75	0	25	0	6.25	0	0	0	0
XII	20-21	274.5	1129	0	0	0	0	0	0	0	0	0	0	0	0	0	0	0	0	0	0	0	0	0	0	0	0	0	0	0	0	0	0	0	0	0	0	21.4286	7.14286	28.5714	0	42.8571	0	0	0	0	0	6.66667
XII	30-31	284.5	1148	0	0	0	0	0	0	0	0	0	0	0	0	0	0	0	0	0	0	0	0	0	0	0	0	0	0	0	0	0	0	0	0	0	0	37.5	0	25	0	12.5	0	25	0	0	0	0
XII	40-41	294.5	1167	0	0	0	0	0	0	0	0	15.3846	0	0	0	0	0	0	0	0	0	0	0	0	0	0	0	0	0	0	0	0	0	0	0	0	0	30.7692	0	7.69231	0	46.1538	0	0	0	0	0	0
XII	50-51	304.5	1186	0	0	0	0	0	0	0	0	68.5714	0	21.4286	2.85714	0	0	0	0	0	0	0	0	0	0	0	0	1.42857	0	0	0	0	0	1.42857	0	0	0	2.85714	0	0	0	1.42857	0	0	0	0	0	0
XII	60-61	314.5	1205	0	0	0	0	0	0	1.19048	0	73.8095	0	0	3.57143	0	0	0	0	0	0	0	0	0	0	0	1.19048	2.38095	0	0	0	0	0	0	0	0	0	1.19048	1.19048	9.52381	0	5.95238	0	0	0	0	0	6.66667
XII	70-71	324.5	1225	0	0	0	0	0	2.5	0	0	60	0	0	0	0	0	0	0	0	0	0	0	0	0	0	0	5	0	0	0	0	0	0	0	0	0	22.5	0	2.5	0	7.5	0	0	0	0	0	4.7619
XII	80-81	334.5	1245	0	0	0	0	0	0	0	0	47.0588	0	0	5.88235	0	0	0	0	5.88235	0	0	0	0	0	0	0	0	0	0	0	0	0	0	0	0	0	5.88235	0	17.6471	0	17.6471	0	0	0	0	0	5.55556
XII	90-91	344.5	1264	0	1.6129	0	0	0	0	0	0	91.9355	0	0	0	0	0	0	0	0	0	0	0	0	0	0	0	1.6129	0	0	0	0	0	0	0	0	0	1.6129	0	0	0	3.22581	0	0	0	0	0	3.125
XI	1-2	352.5	1279	0	0	0	0	0	0	0	0	52.6316	0	0	5.26316	0	0	0	0	0	0	0	0	0	0	0	0	2.63158	0	0	0	0	0	0	0	0	0	7.89474	0	15.7895	0	15.7895	0	0	0	0	0	0
XI	10-11	361.5	1297	0	0	0	0	0	0	0	0	0	0	0	0	0	0	0	0	0	0	0	0	0	0	0	0	0	0	0	0	0	0	0	0	0	0	10.5263	5.26316	21.0526	0	63.1579	0	0	0	0	0	0
XI	20-21	371.5	1317	0	4.34783	0	0	0	0	0	0	26.087	0	0	0	0	0	0	0	0	0	0	0	0	0	0	0	0	0	4.34783	0	0	0	0	0	0	4.34783	13.0435	4.34783	26.087	0	17.3913	0	0	0	0	0	0
XI	30-31	381.5	1336	0	0	0	0	0	0	0	0	72.0588	0	0	20.5882	0	0	0	0	0	0	0	0	0	0	0	0	2.94118	0	0	0	0	0	0	0	0	0	1.47059	1.47059	0	0	1.47059	0	0	0	0	0	5.55556
XI	40-41	391.5	1356	0	0	0	0	0	0	0	0	78.4314	0	0	5.88235	0	0	0	0	0	0	0	0	0	0	0	0	0	0	0	0	0	0	0	0	0	0	0	1.96078	9.80392	0	1.96078	0	1.96078	0	0	0	0
XI	50-51	401.5	1375	0	0	0	0	0	0	0	0	23.5294	0	0	5.88235	0	0	0	0	0	0	0	0	0	0	5.88235	0	0	0	5.88235	0	0	0	0	0	0	0	11.7647	0	23.5294	0	23.5294	0	0	0	0	0	5.55556
XI	60-61	411.5	1394	0	1.08108	0	0	0	0	0	0	83.7838	0	0	1.62162	0	0	0	0	0	0	0	0	0	0	0	0	4.32432	0	0	0	0	0	0	0	0	0	2.16216	1.62162	3.78378	0.540541	1.08108	0	0	0	0	0	0.537634
XI	70-71	421.5	1414	0	0	4.08163	0	0	0	0	0	44.898	0	0	18.3673	0	0	0	6.12245	2.04082	0	0	0	0	0	0	0	0	0	2.04082	0	0	0	0	0	0	0	0	2.04082	12.2449	2.04082	2.04082	0	4.08163	0	0	0	9.25926
XI	80-81	431.5	1432	0	1.53846	0	0	0	0	0	0	58.4615	1.53846	0	6.15385	0	0	0	0	0	0	0	0	0	0	0	0	0	0	1.53846	0	0	0	0	0	0	0	9.23077	0	13.8462	0	7.69231	0	0	0	0	0	2.98507
XI	90-91	441.5	1452	0	0	0	0	0	0	0	0	64.7059	0	0	0.980392	0	0	0.980392	0	0	0	0	0	1.96078	0	0	0	4.90196	0	0	0	0	0	0	0	0	0	0.980392	8.82353	3.92157	0	12.7451	0	0	0	0	0	0
X	1-2	451.5	1470	0	0	0	0	0	0	0	0	77.027	0	0	2.7027	0	0	0	0	0	0	0	0	0	0	0	0	0	0	0	0	0	0	0	0	0	0	1.35135	2.7027	4.05405	0	10.8108	0	1.35135	0	0	0	2.63158
X	10-11	460.5	1486	0	0	0	0	0	0	0	0	90.5172	0	0	0	0	0	0	0	0	0	0	0	0	0	0	0	2.58621	0	0	0	0	0	0	0	0	0	4.31034	0.862069	0	0	0.862069	0	0.862069	0	0	0	0.854701
X	20-21	470.5	1507	0	2.27273	0	0	2.27273	2.27273	0	0	59.0909	0	0	20.4545	0	0	0	2.27273	0	0	0	0	0	0	4.54545	0	0	0	4.54545	0	0	0	0	0	0	0	2.27273	0	0	0	0	0	0	0	0	0	6.38298
X	30-31	480.5	1533	0	0	0	0	0	0	0	0	43.0769	0	0	41.5385	0	0	0	0	1.53846	0	0	0	0	0	1.53846	0	1.53846	0	0	0	0	0	0	0	1.53846	0	4.61538	0	0	0	3.07692	0	1.53846	0	0	0	2.98507
X	40-41	490.5	1559	0	0	0	0	1.11111	1.11111	0	0	55.5556	2.22222	0	32.2222	0	0	0	0	1.11111	0	0	0	0	0	0	0	0	0	0	0	0	0	0	0	0	0	1.11111	0	3.33333	0	2.22222	0	0	0	0	0	6.25
X	50-51	500.5	1585	0	0	0	0	0	0	0	0	64.8936	3.19149	0	15.9574	0	0	0	0	1.06383	0	1.06383	0	0	0	0	0	1.06383	0	2.12766	0	1.06383	0	0	0	0	0	2.12766	0	1.06383	0	6.38298	0	0	0	0	0	0
X	60-61	510.5	1610	0	0	0	0	1.40845	0	0	1.40845	60.5634	0	0	23.9437	0	0	0	0	1.40845	0	0	1.40845	0	0	0	0	0	0	0	0	0	0	0	0	0	0	4.22535	1.40845	1.40845	0	2.8169	0	0	0	0	0	14.4578
X	70-71	520.5	1663	0	0	0	0	2.94118	0	0	0	52.9412	0	2.94118	32.3529	0	0	0	0	0	0	0	0	0	0	0	0	0	0	0	0	0	2.94118	0	0	0	0	0	0	0	0	2.94118	0	2.94118	0	0	0	0
X	80 -81	530.5	1697	0	0	0	0	0	0.44843	0	0	87.4439	0.44843	0	8.07175	0	0	0	0	0	0	0	0	0	0	0	0	0	0	1.34529	0	0	0	0	0	0	0	1.79372	0	0.44843	0	0	0	0	0	0	0	1.32743
X	90-91	540.5	1721	0	0	0	0	0	0	0	0	23.8095	0	0	54.7619	0	0	0	0	7.14286	0	0	0	0	0	0	0	0	0	2.38095	0	2.38095	0	0	0	0	0	2.38095	0	0	0	7.14286	0	0	0	0	0	23.6364
IX	1-2	552.5	1749	0	0	0	0	3.22581	1.6129	0	0	35.4839	0	0	37.0968	0	0	1.6129	0	1.6129	0	0	0	0	0	0	0	0	0	0	0	0	0	0	1.6129	0	0	3.22581	0	8.06452	0	6.45161	0	0	0	0	0	20.5128
IX	10-11	561.5	1772	0	0	0	0	0	0	0	0	62.7451	0	0	19.6078	0	0	0	0	0	0	0	0	0	0	0	0	3.92157	0	0	0	0	0	0	0	0	0	5.88235	1.96078	3.92157	0	1.96078	0	0	0	0	0	0
IX	20-21	571.5	1797	0	0	0	0	0	1.19048	0	0	79.7619	0	0	10.7143	0	0	0	0	0	0	0	0	0	0	0	0	0	0	0	0	0	0	0	0	0	0	3.57143	1.19048	3.57143	0	0	0	0	0	0	0	0
IX	30-31	581.5	1824	0	0	0	2	2	0	0	0	52	0	0	32	0	0	0	2	0	0	0	0	0	0	0	0	2	0	0	0	0	0	0	0	0	0	2	0	2	0	0	0	4	0	0	0	7.40741
IX	40-41	591.5	1851	0	0	0	0	0	0	0	0	79.3939	0	0	8.48485	0	0	0	0	0	0	0	0	0	0	0	0	1.81818	0	0.606061	0	0	0	0	0	0	0	1.81818	0	3.63636	0	3.63636	0	0.606061	0	0	0	1.1976
IX	50-51	601.5	1878	0	0.27248	0.544959	0	0.817439	1.63488	0	0.27248	69.7548	4.63215	0	12.2616	0	0	0	0.544959	0.817439	0.27248	0.27248	0	0	0.544959	0.27248	0	0	0	2.7248	0	0	0	0	0.27248	0	0	0.544959	0	1.08992	0	2.45232	0	0	0	0	0	8.70647
IX	60-61	611.5	1905	1.00503	0.502513	0	0.502513	0	0	0	0	76.8844	2.01005	0	10.0503	0	0.502513	0	1.50754	0.502513	0	0	0	0	0	0	0	1.50754	0.502513	2.01005	0	0	0	0	0.502513	0	0	0	0	0	0	2.01005	0	0	0	0	0	2.45098
IX	70-71	621.5	1932	0	0	0	0	0	0	0	0	45.4545	0	0	9.09091	3.0303	0	0	0	0	0	0	0	0	0	3.0303	0	6.06061	0	0	0	0	0	0	0	0	0	0	3.0303	18.1818	0	12.1212	0	0	0	0	0	10.8108
IX	80-81	631.5	1960	0	0	0	0	0.865052	0	0.17301	0	91.3495	0.17301	0	0.865052	0	0	0	0.17301	0	0	0	0	0	0	0	0	0.692042	0	0.865052	0	0	0	0	0	0	0	0.346021	0	1.55709	0.692042	2.24913	0	0	0	0	0	4.14594
IX	90-91	641.5	1987	0	0.60423	0	0	0.302115	2.1148	0.302115	0	73.4139	0	0	6.0423	0	0.302115	0	1.81269	1.81269	0.906344	0	0	0	0.302115	0	0	3.32326	0	1.81269	0	0	0	0	0	0	0	1.20846	0.906344	1.51057	0	3.02115	0	0	0	0	0.302115	9.56284
IX	99-100	650.5	2012	0	0	0	0	0	0	0	0	25.098	0	0	0.357018	0	0	0	0	0	0	0	0	0	0	0	0	0	0	0.718249	0	0	0	0	0	0	0	1.48603	0	1.85754	0	0.369468	0	0	0	0	0	7.22892

## Sheet: AccumulationFluxes
section	interval (cm)	Cumulative depth(cm)	Age (yrs BP)	Astrononion echolsi	Astrononion antarticum	Cassidulinoides porrectus	Cibicides lobatulus	Cibicides refulgens	Epistominella exigua	Fissurina semimarginata	Fissurina sp.	Globocassidulina biora	Globocassidulina crassa	Globocassidulina sp.	Globocassidulina subglobosa	Heronallenia Kempii	Hyalinonetrion sahulense	Melonis barleanum	Nonionella bradii	Nonionella iridea	Nonionella magnalingua	Nonionella sp.	Oolina exagona	Procerolagena multilatera	Pullenia quinqueloba	Rosalina globularis	Rosalina villardeboana	Stainforthia feylingi	stainforthia sp.	Trifarina angulosa	Miliammina oblonga	Pyrgo depressa	Pyrgo williamsoni	Quinqueloculina seminula	Quinqueloculina sp.	Quinqueloculina venusta	Quinqueloculina Weaveri	Labrospira jeffreysii	Miliammina arenacea	Paratrochammina bartrami	Paratrochammina tricamerata	Portatrochammina antarctica	Portatrochammina bipolaris	Paratrochammina Nana	Pseudotrochammina arenacea	Rhumblerella sp.	Trochammina multiloculata	Neogloboquadrina pachyderma
XV	1-2	1.5	-66	0	0	0	0	0	0	0	0	0	0	0	0	0	0	0	0	0	0	0	0	0	0	0	0	0	0	0	0	0	0	0	0	0	0	0	0	0	0	0	0	0	0	0	0	0
XV	10-11	10.5	-26	0	0	0	0	0	0	0	0	0.0462942	0	0	0	0	0	0	0	0	0	0	0	0	0	0	0	0	0	0	0	0	0	0	0	0	0	0	0	0.0462942	0	0.0462942	0	0	0	0	0	0.0462942
XV	15-16	15.5	50	0	0	0	0	0	0	0	0	0.189826	0	0	0.00730101	0	0	0	0	0	0	0	0	0	0	0	0	0	0	0.00730101	0	0	0	0	0	0	0	0.014602	0	0.021903	0	0.0511071	0	0	0	0	0	0.0365051
XV	20-21	20.5	145	0	0	0	0	0	0	0	0	0.272022	0	0	0.0340028	0	0	0	0	0	0	0	0	0	0	0	0	0	0	0	0	0	0	0	0	0	0	0	0	0.102008	0	0.0340028	0	0	0	0	0	0
XV	25-26	25.5	258	0	0	0	0	0	0	0	0	0	0	0	0.152095	0	0	0	0	0	0	0	0	0	0	0	0	0	0	0	0	0	0	0	0	0	0	0	0.152095	0.152095	0	0.30419	0	0	0	0	0	0.152095
XV	30-31	30.5	372	0	0	0	0	0	0	0	0	0.0459498	0	0	0	0	0	0	0	0	0	0	0	0	0	0	0	0	0	0	0	0	0	0	0	0	0	0	0	0.0918996	0	0	0	0	0	0	0	0
xV	35-36	35.5	478	0	0	0	0	0	0	0	0	0.219449	0	0	0.0365749	0	0	0	0	0	0	0	0	0	0	0	0	0	0	0.0731498	0	0	0	0	0	0	0	0.0548624	0.0365749	0.0365749	0	0.0365749	0	0	0	0	0	0.0182875
XV	40-41	40.5	580	0.0228562	0	0	0	0	0	0	0	0.275536	0	0	0.0229613	0	0	0	0	0	0	0	0	0	0	0	0	0	0	0.0459226	0.0229613	0	0	0	0	0	0	0.0918452	0.0229613	0.0918452	0	0.114807	0	0	0	0	0	0.18369
XV	50-51	50.5	679	0	0	0	0	0	0	0	0	1.3934	0	0	0.0898967	0	0	0	0	0	0	0	0	0	0	0	0	0	0	0.0449483	0	0	0	0	0	0	0	0.179793	0	0.224742	0	0.26969	0	0	0	0	0	0.0898967
XV	60-61	60.5	691	0.290009	0	0	0	0	0	0	0	3.5469	0	0.933394	0	0	0	0	0	0	0	0	0	0	0	0	0	0	0	0.186679	0	0	0	0	0	0	0	0	0.186679	0.373358	0	0.373358	0	0	0	0	0	0
XIV	1-2	65.5	696	0	0	0	0	0	0	0	0	0	0	0	0	0	0	0	0	0	0	0	0	0	0	0	0	0	0	0	0	0	0	0	0.27522	0	0	0	0.27522	2.47698	0	1.3761	0	0	0	0	0	0
XIV	10-11	74.5	708	0	0	0	0	0	0	0	0	4.97641	0	0	0.710915	0	0	0	0	0	0	0	0	0	0	0	0	0	0	0	0	0	0	0	0	0	0	0	0.355458	1.06637	0	0.710915	0	0	0	0	0	0
XIV	20-21	84.5	727	0	0	0	0	0	0	0	0	0	0	0	0	0	0	0	0	0	0	0	0	0	0	0	0	0	0	0	0	0	0	0	0	0	0	0	0	0.575855	0	0	0	0	0	0	0	0
XIV	30-31	94.5	748	0	0	0	0	0	0	0	0	0	0	0	0	0	0	0	0	0	0	0	0	0	0	0	0	0	0	0	0	0	0	0	0	0	0	0.260254	0	0.780763	0.260254	0.780763	0	0.520509	0	0	0	0
XIV	40-41	104.5	770	0	0	0	0	0	0	0	0	0	0	0	0	0	0	0	0	0	0	0	0	0	0	0	0	0	0	0	0	0	0	0	0	0	0	0	0	3.39915	0	2.2661	0	1.69958	0	0	0	0
XIV	50-51	114.5	793	0	0	0	0	0	0	0	0	0	0	0	0	0	0	0	0	0	0	0	0	0	0	0	0	0	0	0	0	0	0	0	0	0	0	0	0	0.861343	0	0.287114	0	0	0	0	0	0
XIV	60-61	124.5	816	0	0	0	0	0	0	0	0	0	0	0	0	0	0	0	0	0	0	0	0	0	0	0	0	0	0	0	0	0	0	0	0	0	0	0	0	0.597707	0	0.896561	0	0	0	0	0	0
XIV	70-71	134.5	838	0	0	0	0	0	0	0	0	0	0	0	0	0	0	0	0	0	0	0	0	0	0	0	0	0	0	0	0	0	0	0	0	0	0	0	0	1.18763	0	0	0	0	0	0	0	0
XIV	80-81	144.5	861	0	0	0	0	0	0	0	0	0	0	0	0	0	0	0	0	0	0	0	0	0	0	0	0	0	0	0	0	0	0	0	0	0	0	0.665409	0	0.665409	0	2.66164	0	0.665409	0	0	0	0
XIV	89-90	153.5	881	0	0	0	0	0	0	0	0	0	0	0	0	0	0	0	0	0	0	0	0	0	0	0	0	0	0	0	0	0	0	0	0	0	0	0	0	0	0	0	0	0	0	0	0	0
XIII	1-2	157.5	890	0	0	0	0	0	0	0	0	0	0	0	0	0	0	0	0	0	0	0	0	0	0	0	0	0	0	0	0	0	0	0	0	0	0	0.42054	0.42054	0.84108	0	2.1027	0	0	0	0	0	0
XIII	10-11	166.5	910	0	0	0	0	0	0	0	0	0.269883	0	0	0	0	0	0	0	0	0	0	0	0	0	0	0	0	0	0	0	0	0	0	0	0	0	0.539766	0.269883	1.88918	0	2.15906	0	0	0	0	0	0
XIII	20-21	176.5	931	0	0	0	0	0	0	0	0	0	0	0	0	0	0	0	0	0	0	0	0	0	0	0	0	0	0	0	0	0	0	0	0	0	0	1.0413	0.20826	2.0826	0	1.0413	0	0	0	0.20826	0	0
XIII	30-31	186.5	953	0	0	0	0	0	0	0	0	0	0	0	0	0	0	0	0	0	0	0	0	0	0	0	0	0	0	0	0	0	0	0	0	0	0	0.747001	0	1.1205	0	1.1205	0	0	0	0	0	0
XIII	40-41	196.5	974	0	0	0	0	0	0	0	0	1.02543	0	0	0	0	0	0	0	0	0	0	0	0	0	0	0	0	0	0	0	0	0	0	0	0	0	2.05085	0	0	0	0	0	0	0	0	0	0
XIII	50-51	206.5	995	0	0	0	0	0	0	0	0	4.38291	0	0	0	0	0	0	0	0	0	0	0	0	0	0	0	0.313065	0	0	0	0	0	0	0	0	0	1.56532	0	1.25226	0	2.19145	0	0.313065	0	0	0	0
XIII	60-61	216.5	1016	0	0	0	0	0	0	0	0	1.10044	0	0	0	0	0	0	0	0	0	0	0	0	0	0	0	0	0	0	0	0	0	0	0	0	0	0.550221	0	3.30133	0.366814	4.58518	0	0	0	0.183407	0	0
XIII	70-71	226.5	1037	0	0	0	0	0	0	0	0	2.94752	0	0	0	0	0	0	0	0	0	0	0	0	0	0	0	0.803869	0	0.535913	0	0	0	0	0	0	0	1.07183	0	1.07183	0	0.267956	0	0	0.535913	0	0	0.267956
XIII	80-81	236.5	1057	0	0	0	0	0	0	0	0	41.6579	0	0	0.54813	0	0	0	0	0	0	0	0	0	0	0	0	1.09626	0	0	0	0	0	0	0	0	0	1.09626	0	0.54813	0	0	0	0	0	0	0	1.09626
XIII	90-91	246.5	1076	0	0	0	0	0	0	0	0	1.54976	0	0	0.154976	0	0	0	0	0	0	0	0	0	0	0	0	0	0	0	0	0	0	0	0	0	0	0.309952	0	0.77488	0	0.464928	0.309952	0	0	0	0	0
XII	1-2	254.5	1091	0	0	0	0	0	0	0	0	0	0	0	0	0	0	0	0	0	0	0	0	0	0	0	0	0	0	0	0	0	0	0	0	0	0	0.800271	0.266757	0.800271	0.266757	1.33378	0	0	0	0	0	0
XII	10-11	264.5	1109	0	0	0	0	0	0	0	0	0	0	0	0	0	0	0	0	0	0	0	0	0	0	0	0	0	0	0	0	0	0	0	0	0	0	0.909541	0.30318	2.12226	0	1.21272	0	0.30318	0	0	0	0
XII	20-21	274.5	1129	0	0	0	0	0	0	0	0	0	0	0	0	0	0	0	0	0	0	0	0	0	0	0	0	0	0	0	0	0	0	0	0	0	0	0.590572	0.196857	0.787429	0	1.18114	0	0	0	0	0	0.196857
XII	30-31	284.5	1148	0	0	0	0	0	0	0	0	0	0	0	0	0	0	0	0	0	0	0	0	0	0	0	0	0	0	0	0	0	0	0	0	0	0	0.617969	0	0.411979	0	0.20599	0	0.411979	0	0	0	0
XII	40-41	294.5	1167	0	0	0	0	0	0	0	0	0.480403	0	0	0	0	0	0	0	0	0	0	0	0	0	0	0	0	0	0	0	0	0	0	0	0	0	0.960807	0	0.240202	0	1.44121	0	0	0	0	0	0
XII	50-51	304.5	1186	0	0	0	0	0	0	0	0	14.2358	0	4.4487	0.59316	0	0	0	0	0	0	0	0	0	0	0	0	0.29658	0	0	0	0	0	0.29658	0	0	0	0.59316	0	0	0	0.29658	0	0	0	0	0	0
XII	60-61	314.5	1205	0	0	0	0	0	0	0.28835	0	17.8777	0	0	0.86505	0	0	0	0	0	0	0	0	0	0	0	0.28835	0.5767	0	0	0	0	0	0	0	0	0	0.28835	0.28835	2.3068	0	1.44175	0	0	0	0	0	1.7301
XII	70-71	324.5	1225	0	0	0	0	0	0.241285	0	0	5.79084	0	0	0	0	0	0	0	0	0	0	0	0	0	0	0	0.48257	0	0	0	0	0	0	0	0	0	2.17156	0	0.241285	0	0.723855	0	0	0	0	0	0.48257
XII	80-81	334.5	1245	0	0	0	0	0	0	0	0	2.80213	0	0	0.350266	0	0	0	0	0.350266	0	0	0	0	0	0	0	0	0	0	0	0	0	0	0	0	0	0.350266	0	1.0508	0	1.0508	0	0	0	0	0	0.350266
XII	90-91	344.5	1264	0	0.546739	0	0	0	0	0	0	31.1641	0	0	0	0	0	0	0	0	0	0	0	0	0	0	0	0.546739	0	0	0	0	0	0	0	0	0	0.546739	0	0	0	1.09348	0	0	0	0	0	1.09348
XI	1-2	352.5	1279	0	0	0	0	0	0	0	0	3.66271	0	0	0.366271	0	0	0	0	0	0	0	0	0	0	0	0	0.183135	0	0	0	0	0	0	0	0	0	0.549406	0	1.09881	0	1.09881	0	0	0	0	0	0
XI	10-11	361.5	1297	0	0	0	0	0	0	0	0	0	0	0	0	0	0	0	0	0	0	0	0	0	0	0	0	0	0	0	0	0	0	0	0	0	0	0.382471	0.191235	0.764942	0	2.29483	0	0	0	0	0	0
XI	20-21	371.5	1317	0	0.242788	0	0	0	0	0	0	1.45673	0	0	0	0	0	0	0	0	0	0	0	0	0	0	0	0	0	0.242788	0	0	0	0	0	0	0.242788	0.728364	0.242788	1.45673	0	0.971152	0	0	0	0	0	0
XI	30-31	381.5	1336	0	0	0	0	0	0	0	0	17.0904	0	0	4.88298	0	0	0	0	0	0	0	0	0	0	0	0	0.697569	0	0	0	0	0	0	0	0	0	0.348785	0.348785	0	0	0.348785	0	0	0	0	0	1.39514
XI	40-41	391.5	1356	0	0	0	0	0	0	0	0	23.6449	0	0	1.77336	0	0	0	0	0	0	0	0	0	0	0	0	0	0	0	0	0	0	0	0	0	0	0	0.591122	2.95561	0	0.591122	0	0.591122	0	0	0	0
XI	50-51	401.5	1375	0	0	0	0	0	0	0	0	1.4434	0	0	0.360849	0	0	0	0	0	0	0	0	0	0	0.360849	0	0	0	0.360849	0	0	0	0	0	0	0	0.721698	0	1.4434	0	1.4434	0	0	0	0	0	0.360849
XI	60-61	411.5	1394	0	0.55853	0	0	0	0	0	0	43.2861	0	0	0.837795	0	0	0	0	0	0	0	0	0	0	0	0	2.23412	0	0	0	0	0	0	0	0	0	1.11706	0.837795	1.95485	0.279265	0.55853	0	0	0	0	0	0.279265
XI	70-71	421.5	1414	0	0	0.626151	0	0	0	0	0	6.88766	0	0	2.81768	0	0	0	0.939226	0.313075	0	0	0	0	0	0	0	0	0	0.313075	0	0	0	0	0	0	0	0	0.313075	1.87845	0.313075	0.313075	0	0.626151	0	0	0	1.56538
XI	80-81	431.5	1432	0	0.441435	0	0	0	0	0	0	16.7745	0.441435	0	1.76574	0	0	0	0	0	0	0	0	0	0	0	0	0	0	0.441435	0	0	0	0	0	0	0	2.64861	0	3.97291	0	2.20717	0	0	0	0	0	0.88287
XI	90-91	441.5	1452	0	0	0	0	0	0	0	0	14.4827	0	0	0.219435	0	0	0.219435	0	0	0	0	0	0.43887	0	0	0	1.09718	0	0	0	0	0	0	0	0	0	0.219435	1.97492	0.87774	0	2.85266	0	0	0	0	0	0
X	1-2	451.5	1470	0	0	0	0	0	0	0	0	11.1174	0	0	0.390084	0	0	0	0	0	0	0	0	0	0	0	0	0	0	0	0	0	0	0	0	0	0	0.195042	0.390084	0.585126	0	1.56033	0	0.195042	0	0	0	0.390084
X	10-11	460.5	1486	0	0	0	0	0	0	0	0	22.1451	0	0	0	0	0	0	0	0	0	0	0	0	0	0	0	0.632718	0	0	0	0	0	0	0	0	0	1.05453	0.210906	0	0	0.210906	0	0.210906	0	0	0	0.210906
X	20-21	470.5	1507	0	0.351792	0	0	0.351792	0.351792	0	0	9.14658	0	0	3.16612	0	0	0	0.351792	0	0	0	0	0	0	0.703583	0	0	0	0.703583	0	0	0	0	0	0	0	0.351792	0	0	0	0	0	0	0	0	0	1.05537
X	30-31	480.5	1533	0	0	0	0	0	0	0	0	10.5304	0	0	10.1543	0	0	0	0	0.376084	0	0	0	0	0	0.376084	0	0.376084	0	0	0	0	0	0	0	0.376084	0	1.12825	0	0	0	0.752169	0	0.376084	0	0	0	0.752169
X	40-41	490.5	1559	0	0	0	0	0.252585	0.252585	0	0	12.6292	0.50517	0	7.32496	0	0	0	0	0.252585	0	0	0	0	0	0	0	0	0	0	0	0	0	0	0	0	0	0.252585	0	0.757755	0	0.50517	0	0	0	0	0	1.51551
X	50-51	500.5	1585	0	0	0	0	0	0	0	0	10.0463	0.494078	0	2.47039	0	0	0	0	0.164693	0	0.164693	0	0	0	0	0	0.164693	0	0.329386	0	0.164693	0	0	0	0	0	0.329386	0	0.164693	0	0.988157	0	0	0	0	0	0
X	60-61	510.5	1610	0	0	0	0	0.342225	0	0	0.342225	14.7157	0	0	5.81783	0	0	0	0	0.342225	0	0	0.342225	0	0	0	0	0	0	0	0	0	0	0	0	0	0	1.02668	0.342225	0.342225	0	0.68445	0	0	0	0	0	4.1067
X	70-71	520.5	1663	0	0	0	0	0.330205	0	0	0	5.94369	0	0.330205	3.63226	0	0	0	0	0	0	0	0	0	0	0	0	0	0	0	0	0	0.330205	0	0	0	0	0	0	0	0	0.330205	0	0.330205	0	0	0	0
X	80 -81	530.5	1697	0	0	0	0	0	0.249641	0	0	48.6799	0.249641	0	4.49353	0	0	0	0	0	0	0	0	0	0	0	0	0	0	0.748922	0	0	0	0	0	0	0	0.998563	0	0.249641	0	0	0	0	0	0	0	0.748922
X	90-91	540.5	1721	0	0	0	0	0	0	0	0	3.43194	0	0	7.89345	0	0	0	0	1.02958	0	0	0	0	0	0	0	0	0	0.343194	0	0.343194	0	0	0	0	0	0.343194	0	0	0	1.02958	0	0	0	0	0	4.46152
IX	1-2	552.5	1749	0	0	0	0	0.240982	0.120491	0	0	2.6508	0	0	2.77129	0	0	0.120491	0	0.120491	0	0	0	0	0	0	0	0	0	0	0	0	0	0	0.120491	0	0	0.240982	0	0.602455	0	0.481964	0	0	0	0	0	1.92786
IX	10-11	561.5	1772	0	0	0	0	0	0	0	0	9.73446	0	0	3.04202	0	0	0	0	0	0	0	0	0	0	0	0	0.608404	0	0	0	0	0	0	0	0	0	0.912605	0.304202	0.608404	0	0.304202	0	0	0	0	0	0
IX	20-21	571.5	1797	0	0	0	0	0	0.152235	0	0	10.1998	0	0	1.37012	0	0	0	0	0	0	0	0	0	0	0	0	0	0	0	0	0	0	0	0	0	0	0.456706	0.152235	0.456706	0	0	0	0	0	0	0	0
IX	30-31	581.5	1824	0	0	0	0.472099	0.472099	0	0	0	12.2746	0	0	7.55359	0	0	0	0.472099	0	0	0	0	0	0	0	0	0.472099	0	0	0	0	0	0	0	0	0	0.472099	0	0.472099	0	0	0	0.944198	0	0	0	1.8884
IX	40-41	591.5	1851	0	0	0	0	0	0	0	0	20.3094	0	0	2.17047	0	0	0	0	0	0	0	0	0	0	0	0	0.4651	0	0.155033	0	0	0	0	0	0	0	0.4651	0	0.9302	0	0.9302	0	0.155033	0	0	0	0.310067
IX	50-51	601.5	1878	0	0.1091	0.2182	0	0.3273	0.6546	0	0.1091	27.9296	1.8547	0	4.9095	0	0	0	0.2182	0.3273	0.1091	0.1091	0	0	0.2182	0.1091	0	0	0	1.091	0	0	0	0	0.1091	0	0	0.2182	0	0.4364	0	0.981901	0	0	0	0	0	3.8185
IX	60-61	611.5	1905	0.231735	0.137187	0	0.137187	0	0	0	0	20.9896	0.548747	0	2.74374	0	0.137187	0	0.411561	0.137187	0	0	0	0	0	0	0	0.411561	0.137187	0.548747	0	0	0	0	0.137187	0	0	0	0	0	0	0.548747	0	0	0	0	0	0.685934
IX	70-71	621.5	1932	0	0	0	0	0	0	0	0	3.72603	0	0	0.745207	0.248402	0	0	0	0	0	0	0	0	0	0.248402	0	0.496805	0	0	0	0	0	0	0	0	0	0	0.248402	1.49041	0	0.993609	0	0	0	0	0	0.993609
IX	80-81	631.5	1960	0	0	0	0	0.543119	0	0.108624	0	57.3534	0.108624	0	0.543119	0	0	0	0.108624	0	0	0	0	0	0	0	0	0.434495	0	0.543119	0	0	0	0	0	0	0	0.217248	0	0.977614	0.434495	1.41211	0	0	0	0	0	2.7156
IX	90-91	641.5	1987	0	0.190768	0	0	0.095384	0.667688	0.095384	0	23.1783	0	0	1.90768	0	0.095384	0	0.572304	0.572304	0.286152	0	0	0	0.095384	0	0	1.04922	0	0.572304	0	0	0	0	0	0	0	0.381536	0.286152	0.47692	0	0.95384	0	0	0	0	0.095384	3.33844
IX	99-100	650.5	2012	0	0	0	0	0	0	0	0	10.5183	0	0	0.164349	0	0	0	0	0	0	0	0	0	0	0	0	0	0	0.328698	0	0	0	0	0	0	0	0.657396	0	0.821745	0	0.164349	0	0	0	0	0	0.986094

## Sheet: PCA_Loadings
section	interval (cm)	Cumulative depth(cm)	Age (yrs BP)	G. biora FA	P. antarctica/ P. bartrami FA
XV	1-2	1.5	-66	0	0
XV	10-11	10.5	-26	0.65696	0.71358
XV	15-16	15.5	50	0.98074	0.084668
XV	20-21	20.5	145	0.96774	0.19412
XV	25-26	25.5	258	0.067065	0.69488
XV	30-31	30.5	372	0.50253	0.66215
xV	35-36	35.5	478	0.93269	0.051323
XV	40-41	40.5	580	0.91096	0.31564
XV	50-51	50.5	679	0.99058	0.085673
XV	60-61	60.5	691	0.95234	-0.035416
XIV	1-2	65.5	696	0.071031	0.97355
XIV	10-11	74.5	708	0.991	0.080012
XIV	20-21	84.5	727	0.06224	0.80049
XIV	30-31	94.5	748	0.023784	0.8816
XIV	40-41	104.5	770	0.045362	0.9153
XIV	50-51	114.5	793	0.073507	0.93863
XIV	60-61	124.5	816	0.071378	0.90006
XIV	70-71	134.5	838	0.06224	0.80049
XIV	80-81	144.5	861	0.039826	0.71225
XIV	89-90	153.5	881	0	0
XIII	1-2	157.5	890	0.052836	0.80511
XIII	10-11	166.5	910	0.1641	0.94926
XIII	20-21	176.5	931	0.061521	0.94874
XIII	30-31	186.5	953	0.071589	0.93689
XIII	40-41	196.5	974	0.44863	0.030759
XIII	50-51	206.5	995	0.88834	0.32882
XIII	60-61	216.5	1016	0.26076	0.89021
XIII	70-71	226.5	1037	0.89549	0.17771
XIII	80-81	236.5	1057	0.98121	-0.13935
XIII	90-91	246.5	1076	0.90939	0.36266
XII	1-2	254.5	1091	0.044385	0.84146
XII	10-11	264.5	1109	0.059645	0.97213
XII	20-21	274.5	1129	0.061119	0.89148
XII	30-31	284.5	1148	0.010145	0.6063
XII	40-41	294.5	1167	0.31777	0.56755
XII	50-51	304.5	1186	0.93591	-0.16051
XII	60-61	314.5	1205	0.99364	-0.010861
XII	70-71	324.5	1225	0.93822	-0.018423
XII	80-81	334.5	1245	0.93883	0.3123
XII	90-91	344.5	1264	0.98028	-0.13171
XI	1-2	352.5	1279	0.96695	0.23863
XI	10-11	361.5	1297	0.056665	0.7762
XI	20-21	371.5	1317	0.68966	0.68145
XI	30-31	381.5	1336	0.97564	-0.16577
XI	40-41	391.5	1356	0.99191	-0.044754
XI	50-51	401.5	1375	0.65379	0.71192
XI	60-61	411.5	1394	0.98407	-0.11183
XI	70-71	421.5	1414	0.94212	0.019391
XI	80-81	431.5	1432	0.989	0.10848
XI	90-91	441.5	1452	0.97403	-0.0059714
X	1-2	451.5	1470	0.98939	-0.036245
X	10-11	460.5	1486	0.97902	-0.14189
X	20-21	470.5	1507	0.95928	-0.19236
X	30-31	480.5	1533	0.7805	-0.1539
X	40-41	490.5	1559	0.911	-0.13044
X	50-51	500.5	1585	0.98522	-0.11547
X	60-61	510.5	1610	0.96075	-0.13707
X	70-71	520.5	1663	0.89351	-0.17024
X	80 -81	530.5	1697	0.98599	-0.15449
X	90-91	540.5	1721	0.46336	-0.10591
IX	1-2	552.5	1749	0.76401	0.010627
IX	10-11	561.5	1772	0.97857	-0.10795
IX	20-21	571.5	1797	0.99078	-0.12395
IX	30-31	581.5	1824	0.89342	-0.16613
IX	40-41	591.5	1851	0.99374	-0.099831
IX	50-51	601.5	1878	0.98468	-0.14904
IX	60-61	611.5	1905	0.98571	-0.15739
IX	70-71	621.5	1932	0.94904	0.25936
IX	80-81	631.5	1960	0.98203	-0.12619
IX	90-91	641.5	1987	0.98731	-0.13173
IX	99-100	650.5	2012	0.98718	-0.079357
